# Supplementary material for: Relationship of Success Rate for Balloon Adhesiolysis with Clinical Outcomes in Chronic Intractable Lumbar Radicular Pain: A Multicenter Prospective Study
Source: J Clin Med. 2019 May 3;8(5):606. doi: 10.3390/jcm8050606 (PMC6572522; doi:10.3390/jcm8050606)
Supplement: Supplementary file 1 [file jcm-08-00606-s001.pdf]

**Supplemental Table S1.** Baseline characteristics of the study subjects.

| Parameter                                            | <i>n</i> = 275                  |
|------------------------------------------------------|---------------------------------|
| Age, years                                           | 62.0 (13.8)                     |
| Sex, <i>n</i> (%)                                    |                                 |
| Male/female                                          | 149/126 (54.2/45.8)             |
| Body mass index, kg/m <sup>2</sup>                   | 24.2 (3.2)                      |
| Areas of pain, <i>n</i> (%)                          |                                 |
| Back/leg/both                                        | 35/29/211 (12.7/10.5/76.7)      |
| Duration of pain (months)                            | 12.0 (7.0–24.0)                 |
| Concurrent disease, <i>n</i> (%)                     |                                 |
| Diabetes                                             | 45 (16.4)                       |
| Hypertension                                         | 160 (58.2)                      |
| Cardiovascular disease                               | 92 (33.5)                       |
| Spinal stenosis grading, <i>n</i> (%)                |                                 |
| Central canal (A/B/C/D)                              | 60/46/57/4 (21.8/16.7/20.7/1.5) |
| Foraminal (mild/moderate/severe)                     | 90/72/78 (32.7/26.2/28.4)       |
| Spondylolisthesis, <i>n</i> (%)                      | 24 (8.7)                        |
| Target level, <i>n</i> (%)                           |                                 |
| 1 level (L3-4/L4-5/L5-S1)                            | 4/111/22 (1.5/40.4/8.0)         |
| 2 levels (L3-4-5/L4-5-S1)                            | 35/79 (12.7/28.7)               |
| 3 levels (L2-3-4-5/L3-4-5-S1)                        | 5/16 (1.8/5.8)                  |
| 4 levels (L2-3-4-5-S1)                               | 3 (1.1)                         |
| Target site, <i>n</i> (%)                            |                                 |
| Left/right/both/central                              | 40/25/78/20 (14.6/9.1/28.4/7.3) |
| Left, central/right, central/both, central           | 25/24/63 (9.1/8.7/22.9)         |
| Number of target site, <i>n</i> (%)                  |                                 |
| 2–3/4–5/above 6                                      | 93/114/68 (33.8/41.5/24.7)      |
| Success rate of ballooning for targets, <i>n</i> (%) |                                 |
| 0-50%/50-85%/85-100%                                 | 48/79/148 (17.5/28.7/53.8)      |
| Medication quantification scale, points              | 8.8 (8.0–12.4)                  |
| Pain intensity (numeric rating scale)                |                                 |
| Back/Leg                                             | 6.0 (4.0–8.0)/7.0 (5.0–8.0)     |
| Oswestry Disability Index (%)                        | 30.0 (22.5–36.5)                |
| Beck depression inventory                            | 6.0 (4.0–9.0)                   |

Data are expressed as numbers (%), or mean ± standard deviation, or medians (interquartile range).

**Supplemental Table S2.** Observed number of patients who satisfied the individual parameters of successful response at each follow-up visit.

| Parameters                           | Follow-Up<br>(Months) | Below 50% ( <i>n</i> = 48)<br>Number (%) | 50–85% ( <i>n</i> = 79)<br>Number (%) | 85–100% ( <i>n</i> = 148)<br>Number (%) |
|--------------------------------------|-----------------------|------------------------------------------|---------------------------------------|-----------------------------------------|
| ≥50% (or ≥4-point) reduction in NRS  | 1                     | 20 (41.7)                                | 36 (45.6)                             | 70 (47.3)                               |
|                                      | 3                     | 11 (22.9)                                | 38 (48.1)                             | 68 (45.9)                               |
|                                      | 6                     | 12 (25.0)                                | 38 (48.1)                             | 75 (50.7)                               |
| ≥30% (or ≥2-point) reduction in NRS  | 1                     | 33 (68.8)                                | 53 (67.1)                             | 101 (68.2)                              |
|                                      | 3                     | 27 (56.3)                                | 51 (64.6)                             | 96 (64.9)                               |
|                                      | 6                     | 22 (45.8)                                | 48 (60.8)                             | 90 (60.8)                               |
| ≥30% (or ≥10-point) reduction in ODI | 1                     | 18 (37.5)                                | 19 (24.1)                             | 53 (35.8)                               |
|                                      | 3                     | 19 (39.6)                                | 28 (35.4)                             | 62 (41.9)                               |
|                                      | 6                     | 13 (27.1)                                | 28 (35.4)                             | 48 (32.4)                               |
| No change or reduction in MQS        | 1                     | 37 (77.1)                                | 59 (74.7)                             | 98 (66.2)                               |
|                                      | 3                     | 41 (74.55)                               | 54 (62.07)                            | 113 (64.57)                             |
|                                      | 6                     | 5 (10.4)                                 | 5 (6.3)                               | 9 (6.1)                                 |
| ≥5 points in GPES                    | 1                     | 29 (60.4)                                | 46 (58.2)                             | 81 (54.7)                               |
|                                      | 3                     | 27 (56.3)                                | 46 (58.2)                             | 89 (60.1)                               |
|                                      | 6                     | 10 (20.8)                                | 25 (31.6)                             | 66 (44.6)                               |

The patients were divided into three groups—less than 50%, 50–85%, and 85–100%—depending on the success rate of the ballooning procedure for multiple target sites. Data are expressed as numbers (%). NRS, numerical rating scale; ODI, Oswestry disability index; MQS, medication quantification scale; and GPES, global perceived effect of satisfaction.

**Supplemental Table S3.** Changes in the estimated mean pain score and physical function in patients who were treated using decompression and adhesiolysis using an inflatable balloon catheter.

| Variables * | Time (Months) | Below 50% ( <i>n</i> = 48)<br>Values (95% CI) | 50–85% ( <i>n</i> = 79)<br>Values (95% CI) | 85–100% ( <i>n</i> = 148)<br>Values (95% CI) | <i>p</i> -Value † |
|-------------|---------------|-----------------------------------------------|--------------------------------------------|----------------------------------------------|-------------------|
| Back pain   | Baseline      | 6.02 (5.39–6.66)                              | 5.52 (5.02–6.01)                           | 5.72 (5.36–6.08)                             | 0.473             |
|             | 1             | 3.92 (3.27–4.57)                              | 3.61 (3.10–4.12)                           | 3.63 (3.26–4.00)                             | 0.717             |
|             | 3             | 4.51 (3.84–5.18)                              | 3.57 (3.05–4.09)                           | 3.47 (3.09–3.85)                             | 0.026             |
|             | 6             | 4.72 (4.04–5.40)                              | 3.60 (3.07–4.12)                           | 3.21 (2.82–3.61)                             | 0.001             |
| Leg pain    | Baseline      | 6.69 (6.08–7.30)                              | 6.30 (5.83–6.78)                           | 6.24 (5.89–6.59)                             | 0.454             |
|             | 1             | 4.46 (3.83–5.09)                              | 4.22 (3.72–4.71)                           | 3.71 (3.36–4.07)                             | 0.073             |
|             | 3             | 4.98 (4.33–5.63)                              | 4.12 (3.61–4.62)                           | 3.58 (3.21–3.94)                             | 0.001             |
|             | 6             | 5.40 (4.73–6.06)                              | 3.96 (3.45–4.48)                           | 3.26 (2.88–3.64)                             | <0.001            |
| ODI         | Baseline      | 33.54 (30.76–36.32)                           | 30.57 (28.37–32.77)                        | 29.21 (27.50–30.91)                          | 0.034             |
|             | 1             | 25.12 (22.17–28.07)                           | 25.00 (22.69–27.31)                        | 22.68 (20.91–24.45)                          | 0.188             |
|             | 3             | 24.94 (21.90–27.99)                           | 22.97 (20.59–25.36)                        | 20.95 (19.11–22.79)                          | 0.072             |
|             | 6             | 27.37 (24.27–30.46)                           | 22.32 (19.90–24.74)                        | 19.76 (17.87–21.65)                          | <0.001            |

The patients were divided into three groups—less than 50%, 50–85%, and 85–100%—depending on the success rate of the ballooning procedure for multiple target sites. A numerical rating scale was used to assess the intensity of both lower back and leg pain. Oswestry disability index (ODI) was used to assess physical function. \* Outcome variables measured after decompression and adhesiolysis with an inflatable balloon catheter. † A linear mixed model was used in the statistical analysis. Omnibus *p* of back pain, leg pain, and ODI were 0.007, 0.001, and 0.087, respectively. CI = confidence interval.
